# Supplementary material for: RNA Viral Metagenome of Whiteflies Leads to the Discovery and Characterization of a Whitefly-Transmitted Carlavirus in North America
Source: PubMed Central journal article supplement (PMC3897770; doi:10.1371/journal.pone.0086748), 2014-01-21
Supplement: pone.0086748.s001.pdf [file pone.0086748.s001.pdf]

**Table S1.** Primers used to amplify the CpMMV genome

| <b>Primer ID</b> | <b>Sequence (5' - 3')</b>  |
|------------------|----------------------------|
| FL-CpMMV_480R*   | TTGAACTCCTAACAACAAAATCA    |
| FL-CpMMV_480F    | TGATTTTGTGTTAGGAGTTCAA     |
| FL-CpMMV_720R*   | CCAACTAGCAACTCTGGTGGA      |
| FL-CpMMV_720F    | TCCACCAGAGTTGCTAGTTGG      |
| FL-CpMMV_4820R   | ACCTCATGTAGGGGGCAAAG       |
| FL-CpMMV_3430F   | ATCCTTGCCAAAGCGATTA        |
| FL-CpMMV_4820R   | ACCTCATGTAGGGGGCAAAG       |
| FL-CpMMV_4680F   | TAGATTCAGGGTAGCGAAGG       |
| FL-CpMMV_5380R   | TGGTTTCTTTAGCTATGCACATTC   |
| FL-CpMMV_2990F   | AAGGAAGGCAATTGTTGTGC       |
| FL-CpMMV_6490R   | CCCAGGTAAAGATGGTCGATT      |
| FL-CpMMV_5390F   | ACTTTCTGTGGGTGGCACTT       |
| FL-CpMMV_dT-R    | TTTTTTTTTTTTTTTTTAAAACCAGG |

\*Primers used for 5' RACE reaction

All PCR reactions contained 1 µl cDNA, 1 U Apex Red Taq Polymerase (Genesee), 1X NH<sub>4</sub> buffer, 1.5 mM MgCl<sub>2</sub>, and 0.5 µM of each primer. Amplification was performed with an initial denaturation at 94°C for 5 min, followed by 35 cycles of 94°C for 45 sec, 50°C for 45 min (incrementally decreasing the temperature by 0.1°C on each cycle), and 72°C for 1.5 min, and a final extension at 72°C for 8 min.
