# Supplementary material for: RNA Viral Metagenome of Whiteflies Leads to the Discovery and Characterization of a Whitefly-Transmitted Carlavirus in North America
Source: PubMed Central journal article supplement (PMC3897770; doi:10.1371/journal.pone.0086748), 2014-01-21
Supplement: pone.0086748.s004.pdf [file pone.0086748.s004.pdf]

**Table S4.** Amino acid pairwise comparisons among available Cowpea mild mottle virus (CpMMV) nucleic acid binding (NB) proteins.

| CpMMV isolate                       | WF-   |      |         |          |      |        |         |         |           |  |
|-------------------------------------|-------|------|---------|----------|------|--------|---------|---------|-----------|--|
|                                     | Ghana | FL   | Bean-FL | B-Brazil | PR   | Brazil | India-H | India-M | Venezuela |  |
| NC014730_CpMMV_Ghana                | 100   |      |         |          |      |        |         |         |           |  |
| CpMMV_Florida [Whiteflies 2007]     | 61.9  | 100  |         |          |      |        |         |         |           |  |
| CpMMV_Florida [Beans 2011]          | 61.9  | 98.1 | 100     |          |      |        |         |         |           |  |
| DQ885940_CpMMV_Barreiras (B)-Brazil | 57.7  | 90.3 | 90.3    | 100      |      |        |         |         |           |  |
| GU191840_CpMMV_Puerto Rico (PR)     | 61.9  | 99   | 99      | 91.3     | 100  |        |         |         |           |  |
| DQ444266_CpMMV_Brazil               | 60.8  | 98.1 | 98.1    | 90.3     | 99   | 100    |         |         |           |  |
| AF024628_CPMMV-H_India              | 62.9  | 56.7 | 56.7    | 55.7     | 56.7 | 55.7   | 100     |         |           |  |
| AF024629_CPMMV-M_India              | 66    | 62.9 | 62.9    | 57.7     | 62.9 | 62.9   | 63.9    | 100     |           |  |
| JX310549_CpMMV_Venezuela            | 89.1  | 65.3 | 65.3    | 61.4     | 65.3 | 64.4   | 64      | 67      | 100       |  |
